# Supplementary material for: Cost-Effectiveness Analysis of Personalized Hypertension Prevention
Source: MDPI journal article supplement (doi:10.3390/jpm13061001), 2023-06-15
Supplement: s1 [file s1]

**Supplementary Table S1.** Prevalence of prehypertension (120≤SBP<140 mmHg or 80≤DBP<90 mmHg or history of hypertension) by age and gender.

| Age group | Male                                    |                                | Female                                  |                                | Total                                   |                                |
|-----------|-----------------------------------------|--------------------------------|-----------------------------------------|--------------------------------|-----------------------------------------|--------------------------------|
|           | Cases with total samples in parentheses | Prehypertension Prevalence (%) | Cases with total samples in parentheses | Prehypertension Prevalence (%) | Cases with total samples in parentheses | Prehypertension Prevalence (%) |
| 20–29     | 3133(6285)                              | 49.8                           | 1893(10060)                             | 18.8                           | 5026(16345)                             | 30.7                           |
| 30–39     | 5104(9896)                              | 51.6                           | 4328(17345)                             | 25.0                           | 9432(27241)                             | 34.6                           |
| 40–49     | 5826(11362)                             | 51.3                           | 6540(18320)                             | 35.7                           | 12366(29682)                            | 41.7                           |
| 50–59     | 4283(9096)                              | 47.1                           | 5770(14141)                             | 40.8                           | 10053(23237)                            | 43.3                           |
| 60–69     | 3121(7505)                              | 41.6                           | 3839(9462)                              | 40.6                           | 6960(16967)                             | 41.0                           |
| 70–79     | 2036(5408)                              | 37.6                           | 1701(4649)                              | 36.6                           | 3737(10057)                             | 37.2                           |
| Total     | 23503(49552)                            | 47.4                           | 24071(73977)                            | 32.5                           | 47574(123529)                           | 38.5                           |

**Supplementary Table S2.** Prevalence of stage1 hypertension (141<=SBP<160 mmHg or 90<=DBP<100 mmHg or history of hypertension) by age and gender.

| Age group | Male                                    |                                    | Female                                  |                                    | Total                                   |                                    |
|-----------|-----------------------------------------|------------------------------------|-----------------------------------------|------------------------------------|-----------------------------------------|------------------------------------|
|           | Cases with total samples in parentheses | Stage1 Hypertension Prevalence (%) | Cases with total samples in parentheses | Stage1 Hypertension Prevalence (%) | Cases with total samples in parentheses | Stage1 Hypertension Prevalence (%) |
| 20–29     | 353(6287)                               | 5.6                                | 136(10061)                              | 1.4                                | 489(16348)                              | 3.0                                |
| 30–39     | 970(9897)                               | 9.8                                | 540(17354)                              | 3.1                                | 1510(27251)                             | 5.5                                |
| 40–49     | 1810(11367)                             | 15.9                               | 1680(18327)                             | 9.2                                | 3490(29694)                             | 11.8                               |
| 50–59     | 2488(9099)                              | 27.3                               | 3090(14149)                             | 21.8                               | 5578(23248)                             | 24.0                               |
| 60–69     | 2797(7514)                              | 37.2                               | 3283(9479)                              | 34.6                               | 6080(16993)                             | 35.8                               |
| 70–79     | 2410(5426)                              | 44.4                               | 1995(4673)                              | 42.7                               | 4405(10099)                             | 43.6                               |
| Total     | 10828(49590)                            | 21.8                               | 10724(74043)                            | 14.5                               | 21552(123633)                           | 17.4                               |

**Supplementary Table S3.** Prevalence of stage2 hypertension (160<=SBP or 100<=DBP or history of hypertension) by age and gender.

| Age group | Male                                    |                                    | Female                                  |                                    | Total                                   |                                    |
|-----------|-----------------------------------------|------------------------------------|-----------------------------------------|------------------------------------|-----------------------------------------|------------------------------------|
|           | Cases with total samples in parentheses | Stage2 Hypertension Prevalence (%) | Cases with total samples in parentheses | Stage2 Hypertension Prevalence (%) | Cases with total samples in parentheses | Stage2 Hypertension Prevalence (%) |
| 20–29     | 26(6287)                                | 0.4                                | 11(10061)                               | 0.1                                | 37(16348)                               | 0.2                                |
| 30–39     | 95(9897)                                | 1.0                                | 72(17354)                               | 0.4                                | 167(27251)                              | 0.6                                |
| 40–49     | 240(11367)                              | 2.1                                | 195(18327)                              | 1.1                                | 435(29694)                              | 1.5                                |
| 50–59     | 313(9099)                               | 3.4                                | 300(14149)                              | 2.1                                | 613(23248)                              | 2.6                                |
| 60–69     | 387(7514)                               | 5.2                                | 325(9479)                               | 3.4                                | 712(16993)                              | 4.2                                |
| 70–79     | 299(5426)                               | 5.5                                | 253(4673)                               | 5.4                                | 552(10099)                              | 5.5                                |
| Total     | 1360(49590)                             | 2.7                                | 1156(74043)                             | 1.6                                | 2516(123633)                            | 2.0                                |
